# Supplementary material for: (μ-η2:η2-Disulfido)dinickel(II) complexes supported by 6-methyl-TPA ligands
Source: Royal Society of Chemistry journal article supplement (doi:10.1039/b910237j), 2009-01-01
Supplement: b910237j.pdf [file b910237j.pdf]

## Supporting Information

For

### **( $\mu$ - $\eta^2$ : $\eta^2$ -Disulfido)dinickel(II) complexes supported by 6-methyl-TPA ligands**

Atsushi Kunisita,<sup>†</sup> Masayuki Inosako,<sup>‡</sup> Minoru Kubo,<sup>§</sup> Takashi Ogura,<sup>§</sup>  
Hideki Sugimoto,<sup>†</sup> and Shinobu Itoh<sup>†,\*</sup>

<sup>†</sup>*Department of Material and Life Science, Division of Advanced Science and Biotechnology,  
Graduate School of Engineering, Osaka University, 2-1 Yamada-oka, Suita, Osaka 565-0871,  
Japan*

<sup>‡</sup>*Department of Chemistry, Graduate School of Science, Osaka City University, 3-3-138  
Sugimoto, Sumiyoshi-ku, Osaka 558-8585, Japan*

<sup>§</sup>*Research Institute of Picobiology, Graduate School of Life Science, University of Hyogo,  
3-2-1 Kouto, Kamigori-cho, Ako-gun, Hyogo 678-1297, Japan*

**Fig. S1**

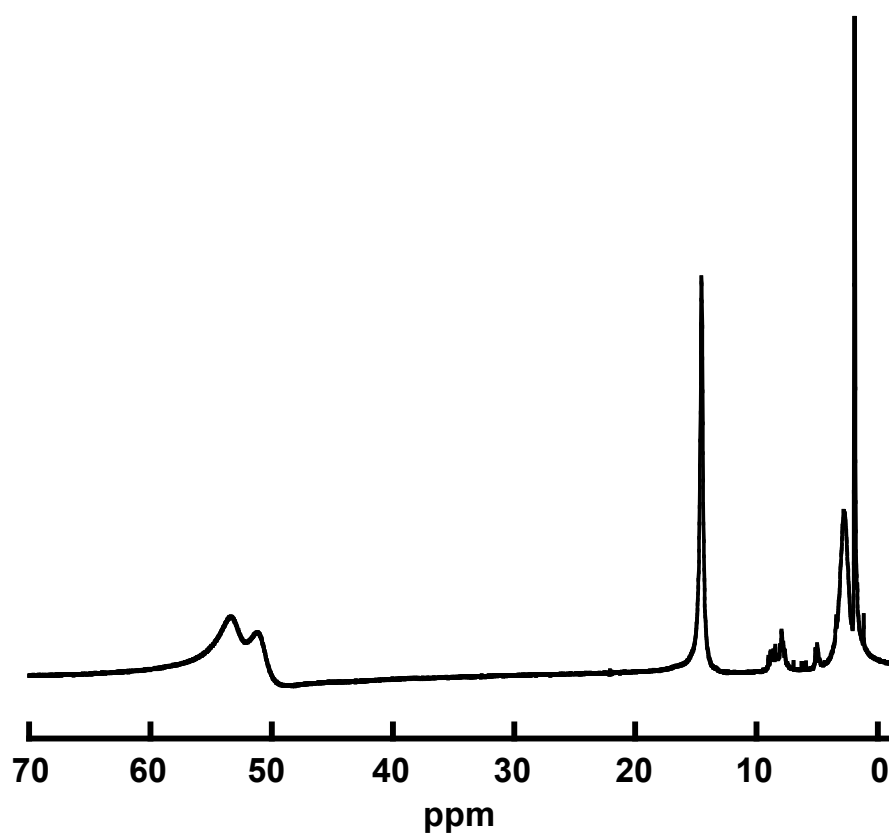

**Fig S1.** <sup>1</sup>H NMR spectrum of **1<sup>0</sup>** in CD<sub>3</sub>CN at 25 °C. Spectrum is referenced to the residual proton of solvent CHD<sub>2</sub>CN at 1.94 ppm.

**Fig. S2**

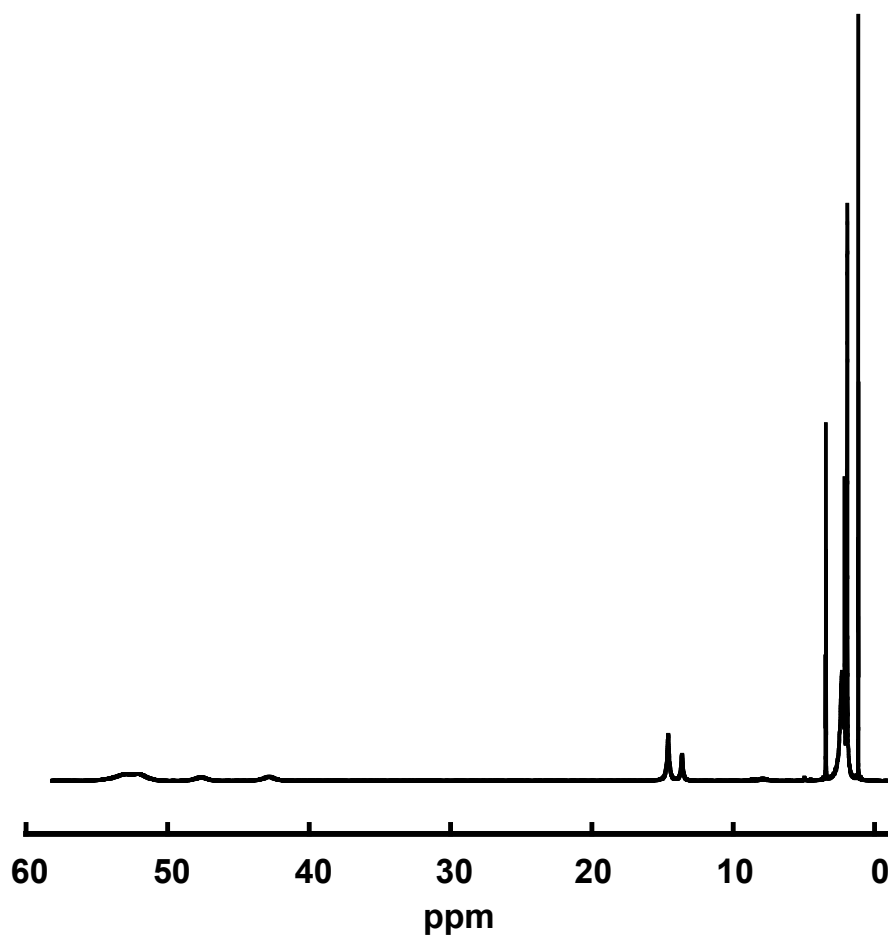

**Fig S2.** <sup>1</sup>H NMR spectrum of **1**<sup>1</sup> in CD<sub>3</sub>CN at 25 °C. Spectrum is referenced to the residual proton of solvent CHD<sub>2</sub>CN at 1.94 ppm.

**Fig. S3**

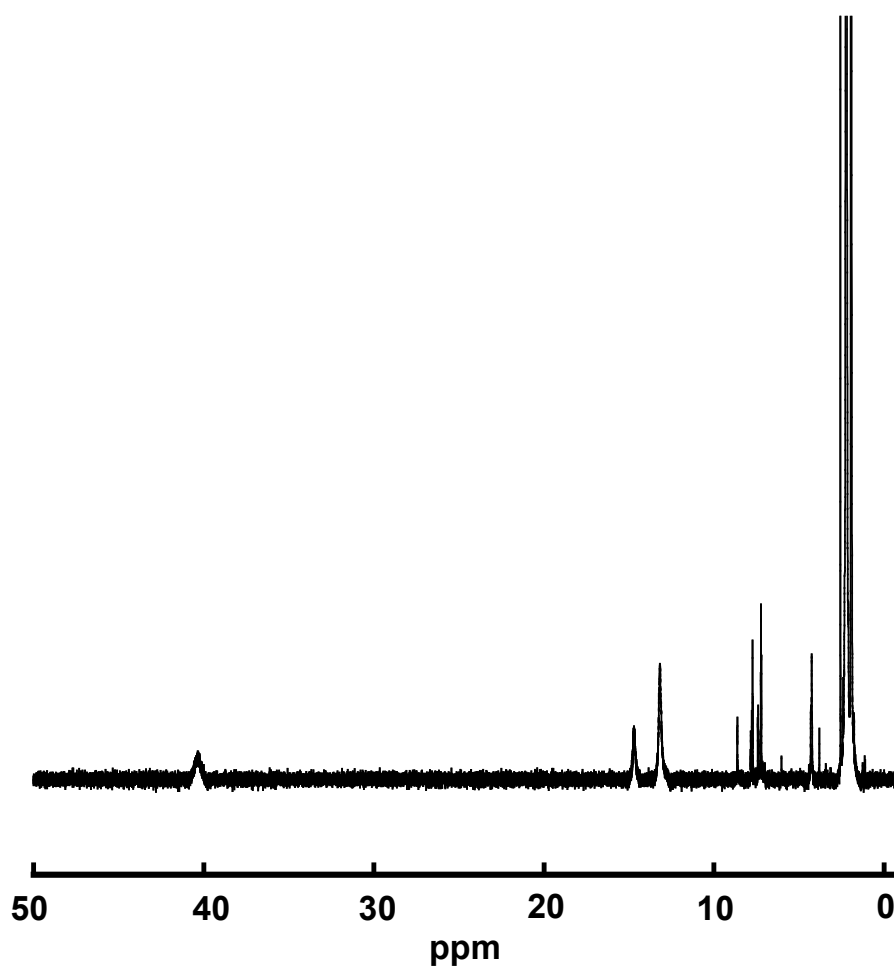

**Fig S3.** <sup>1</sup>H NMR spectrum of **1<sup>2</sup>** in CD<sub>3</sub>CN at 25 °C. Spectrum is referenced to the residual proton of solvent CHD<sub>2</sub>CN at 1.94 ppm.

**Fig. S4**

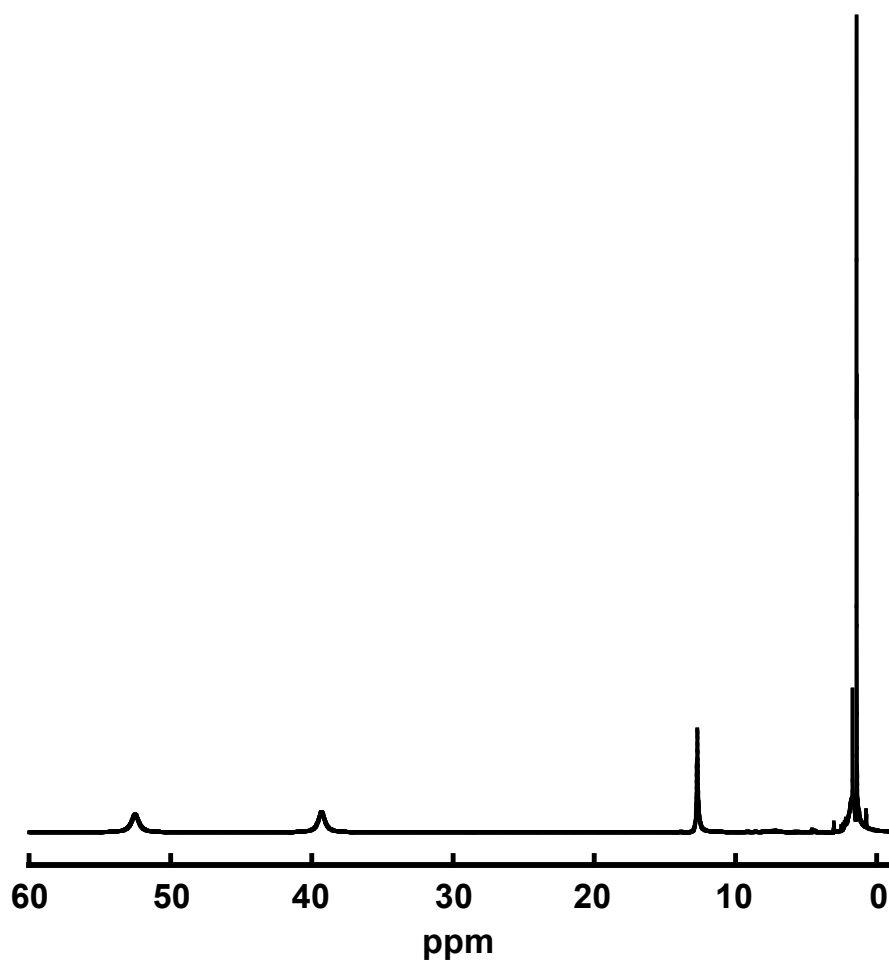

**Fig S4.** <sup>1</sup>H NMR spectrum of **1<sup>3</sup>** in CD<sub>3</sub>CN at 25 °C. Spectrum is referenced to the residual proton of solvent CHD<sub>2</sub>CN at 1.94 ppm.

**Fig. S5**

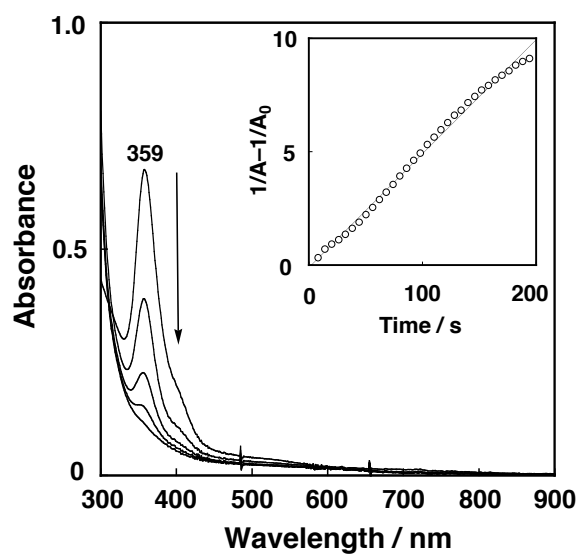

**Fig. S5** Spectral changes for the reaction of  $2^0$  ( $1.0 \times 10^{-4}$  M) and  $\text{PPh}_3$  ( $1.0 \times 10^{-4}$  M) in  $\text{CH}_2\text{Cl}_2$  at 30 °C. Inset: Second-order plot based on the absorption change at 359 nm.

Fig. S6

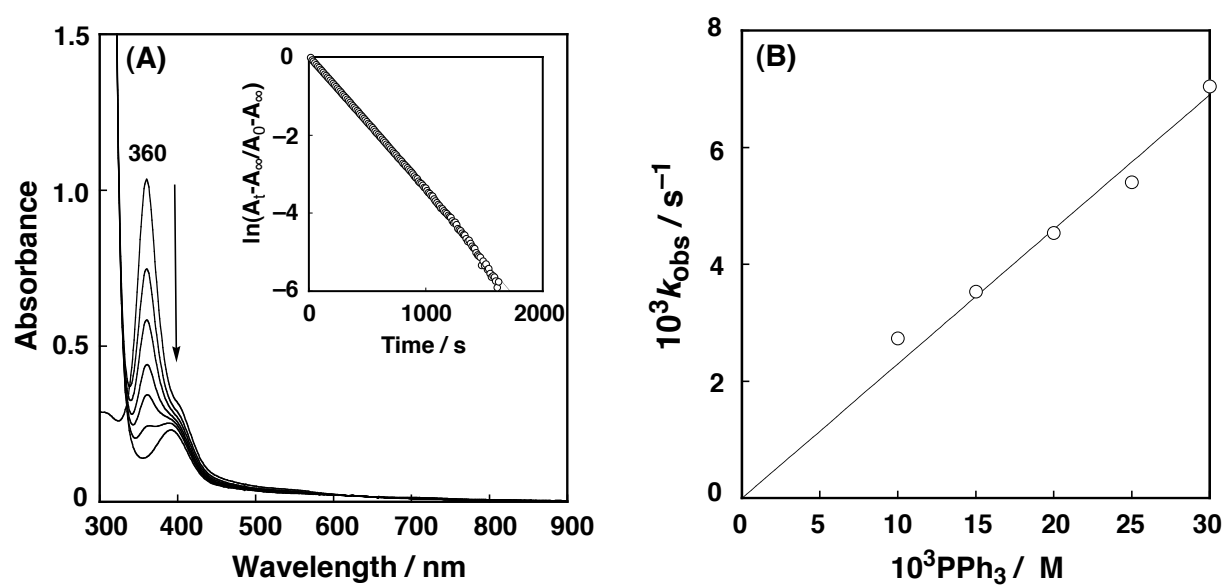

Fig. S6 (A) Spectral changes of the reaction of  $2^2$  ( $1.0 \times 10^{-4}$  M) and  $\text{PPh}_3$  ( $1.5 \times 10^{-2}$  M) in  $\text{CH}_2\text{Cl}_2$  at 30 °C. Inset: first-order plot based on the absorption change at 360 nm. (B) Plot of  $k_{\text{obs}}$  vs  $[\text{PPh}_3]$

Fig. S7

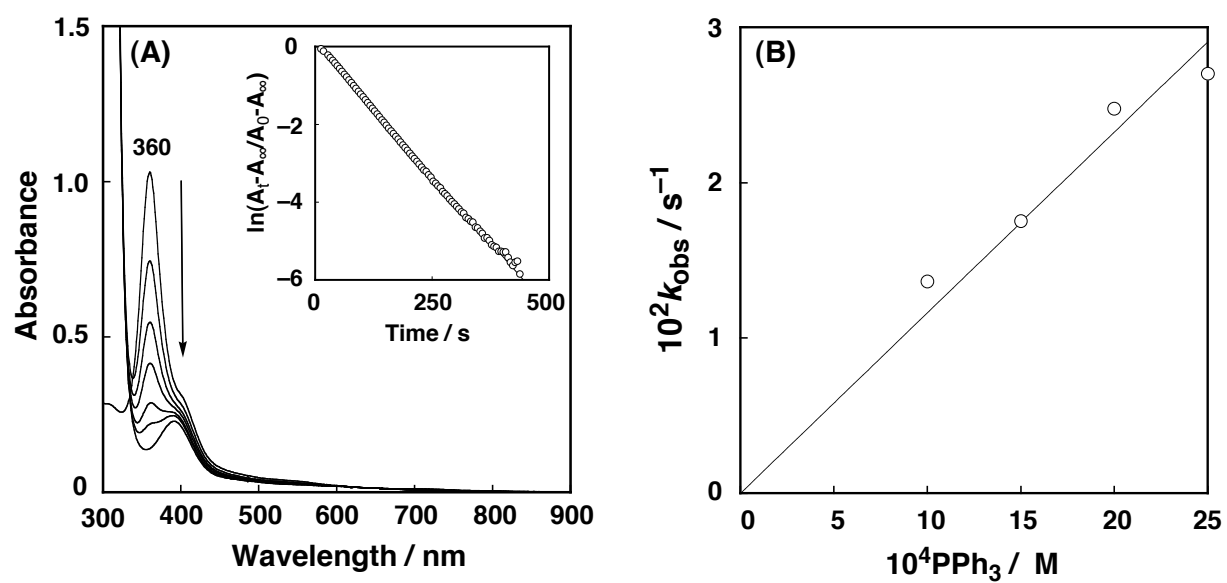

Fig. S7 (A) Spectral changes of the reaction of  $2^3$  ( $1.0 \times 10^{-4}$  M) and  $\text{PPh}_3$  ( $1.0 \times 10^{-3}$  M) in  $\text{CH}_2\text{Cl}_2$  at  $30^\circ\text{C}$ . Inset: first-order plot based on the absorption change at 360 nm. (B) Plot of  $k_{\text{obs}}$  vs  $[\text{PPh}_3]$
